# Supplementary material for: CVD Conditions for MWCNTs Production and Their Effects on the Optical and Electrical Properties of PPy/MWCNTs, PANI/MWCNTs Nanocomposites by In Situ Electropolymerization
Source: PubMed Central journal article supplement (PMC7865428; doi:10.3390/polym13030351), 2021-01-22
Supplement: polymers-13-00351-s001.pdf [file polymers-13-00351-s001.pdf]

## Supplementary material

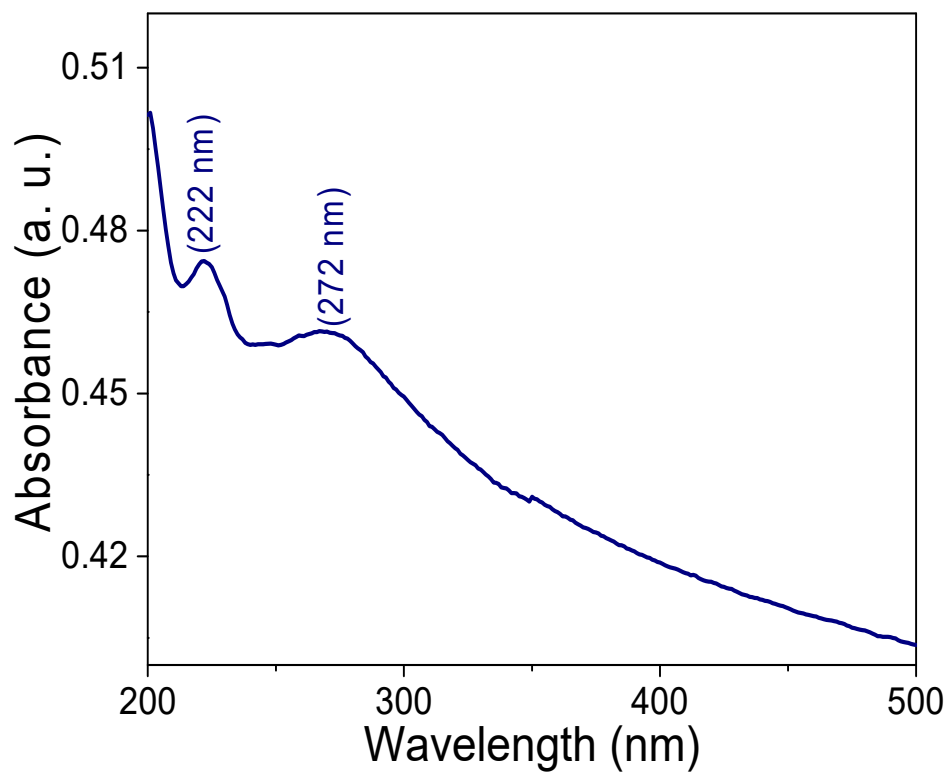

**Figure S1.** UV-vis spectrum of purified commercial MWCNTs.

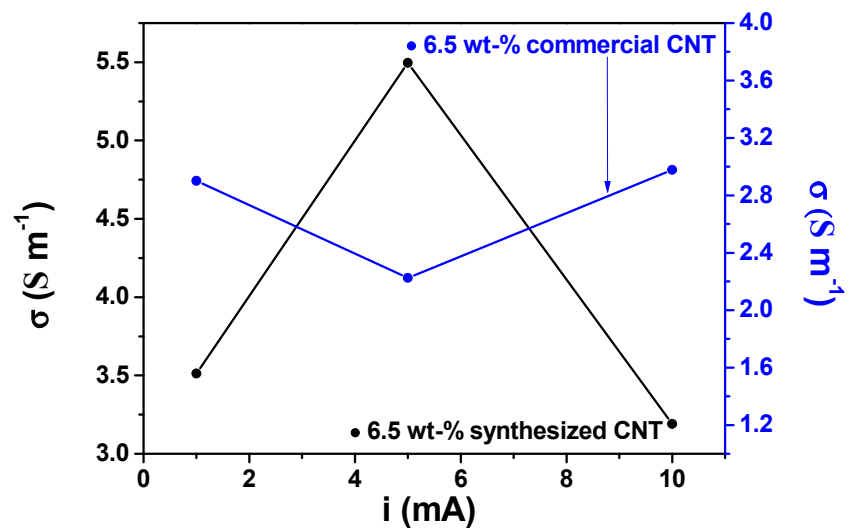

**Figure S2.** Comparison of electrical conductivity of PANI composites using the synthesized and commercial nanotubes with an amount of 6.5 wt-%.

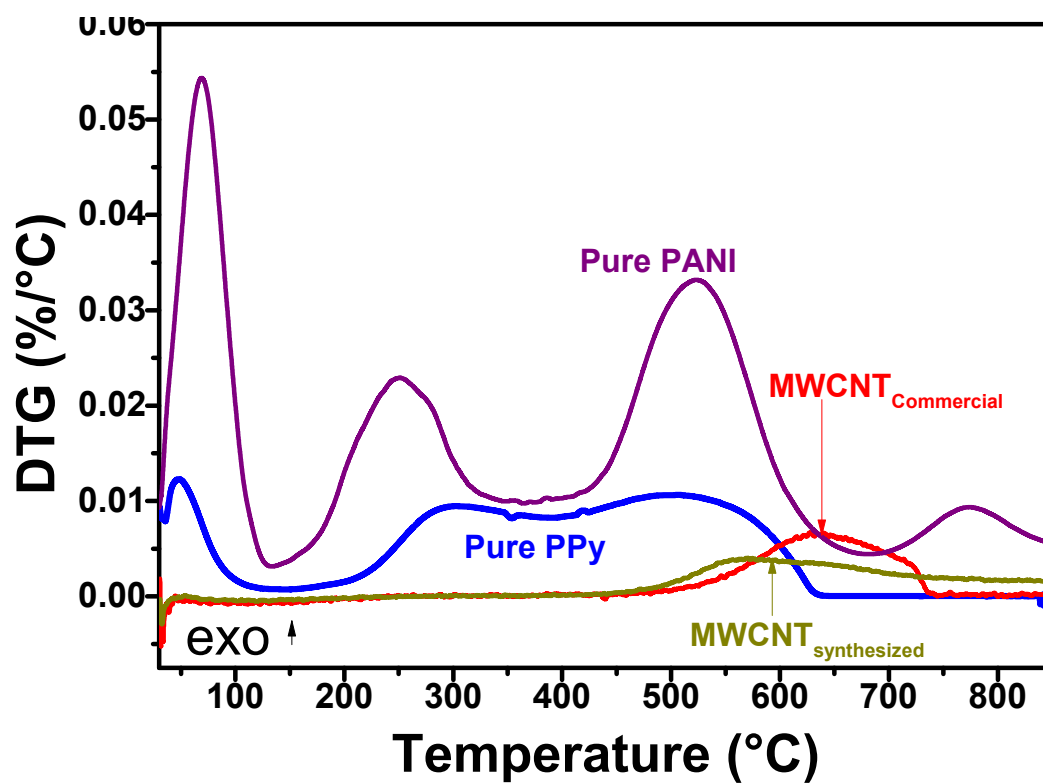

Figure S3. Derivative thermogravimetric analysis of PPy, MW carbon nanotubes synthesized and commercial.

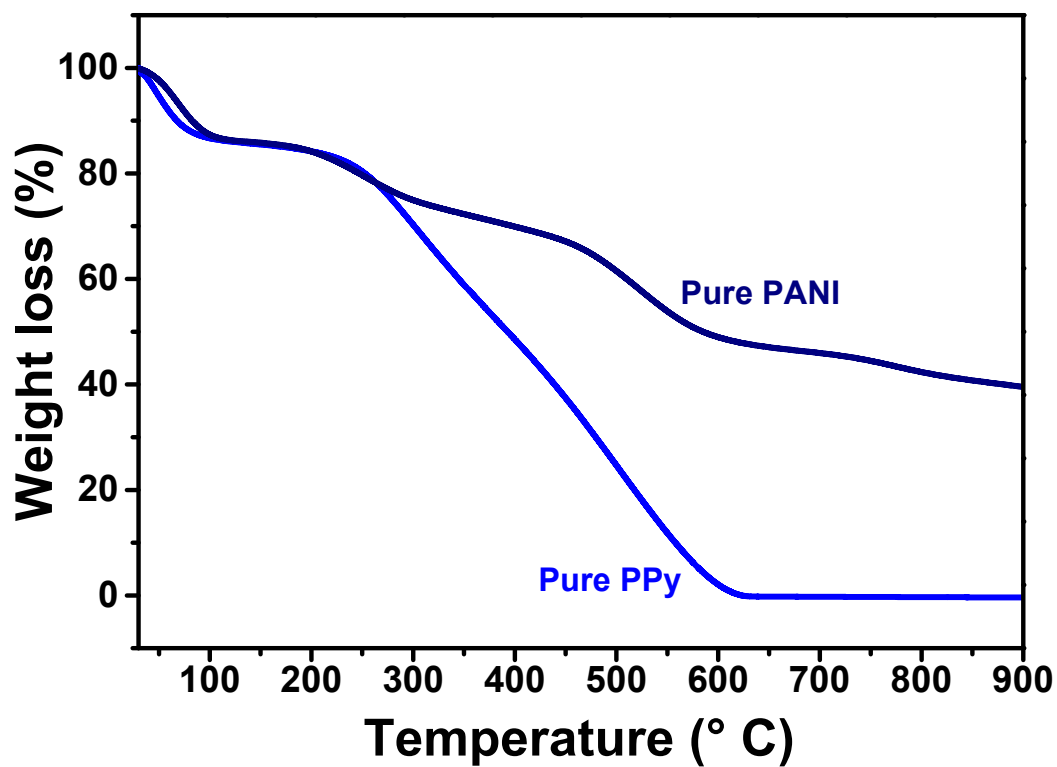

Figure S4. TGA thermograms of pure polymers.
